# Supplementary material for: Is the increased risk of preterm birth following excision for cervical intraepithelial neoplasia restricted to the first birth post treatment?
Source: PubMed Central journal article supplement — BJOG. 2015 Apr 9;122(9):1191–9. doi: 10.1111/1471-0528.13398 (PMC5008142; doi:10.1111/1471-0528.13398), 2015-04-09
Supplement: BJO-122-1191-s004.pdf [file BJO-122-1191-s004.pdf]

To view the full contents of this document, you need a later version of the PDF viewer. You can upgrade to the latest version of Adobe Reader from [www.adobe.com/products/acrobat/readstep2.html](http://www.adobe.com/products/acrobat/readstep2.html)

For further support, go to [www.adobe.com/support/products/acrreader.html](http://www.adobe.com/support/products/acrreader.html)
