# Supplementary material for: Is the increased risk of preterm birth following excision for cervical intraepithelial neoplasia restricted to the first birth post treatment?
Source: PubMed Central journal article supplement — BJOG. 2015 Apr 9;122(9):1191–9. doi: 10.1111/1471-0528.13398 (PMC5008142; doi:10.1111/1471-0528.13398), 2015-04-09
Supplement: BJO-122-1191-s010.pdf [file BJO-122-1191-s010.pdf]

Timing of birth in relation to colposcopy

P-values for the interaction between depth of excision and timing of the birth in relation to colposcopy

**Birth before**

**First birth after**

**Second+ births after**

**First birth after vs. birth before**

**Second+ births after vs. birth before**

**Second+ births after vs. first birth after**

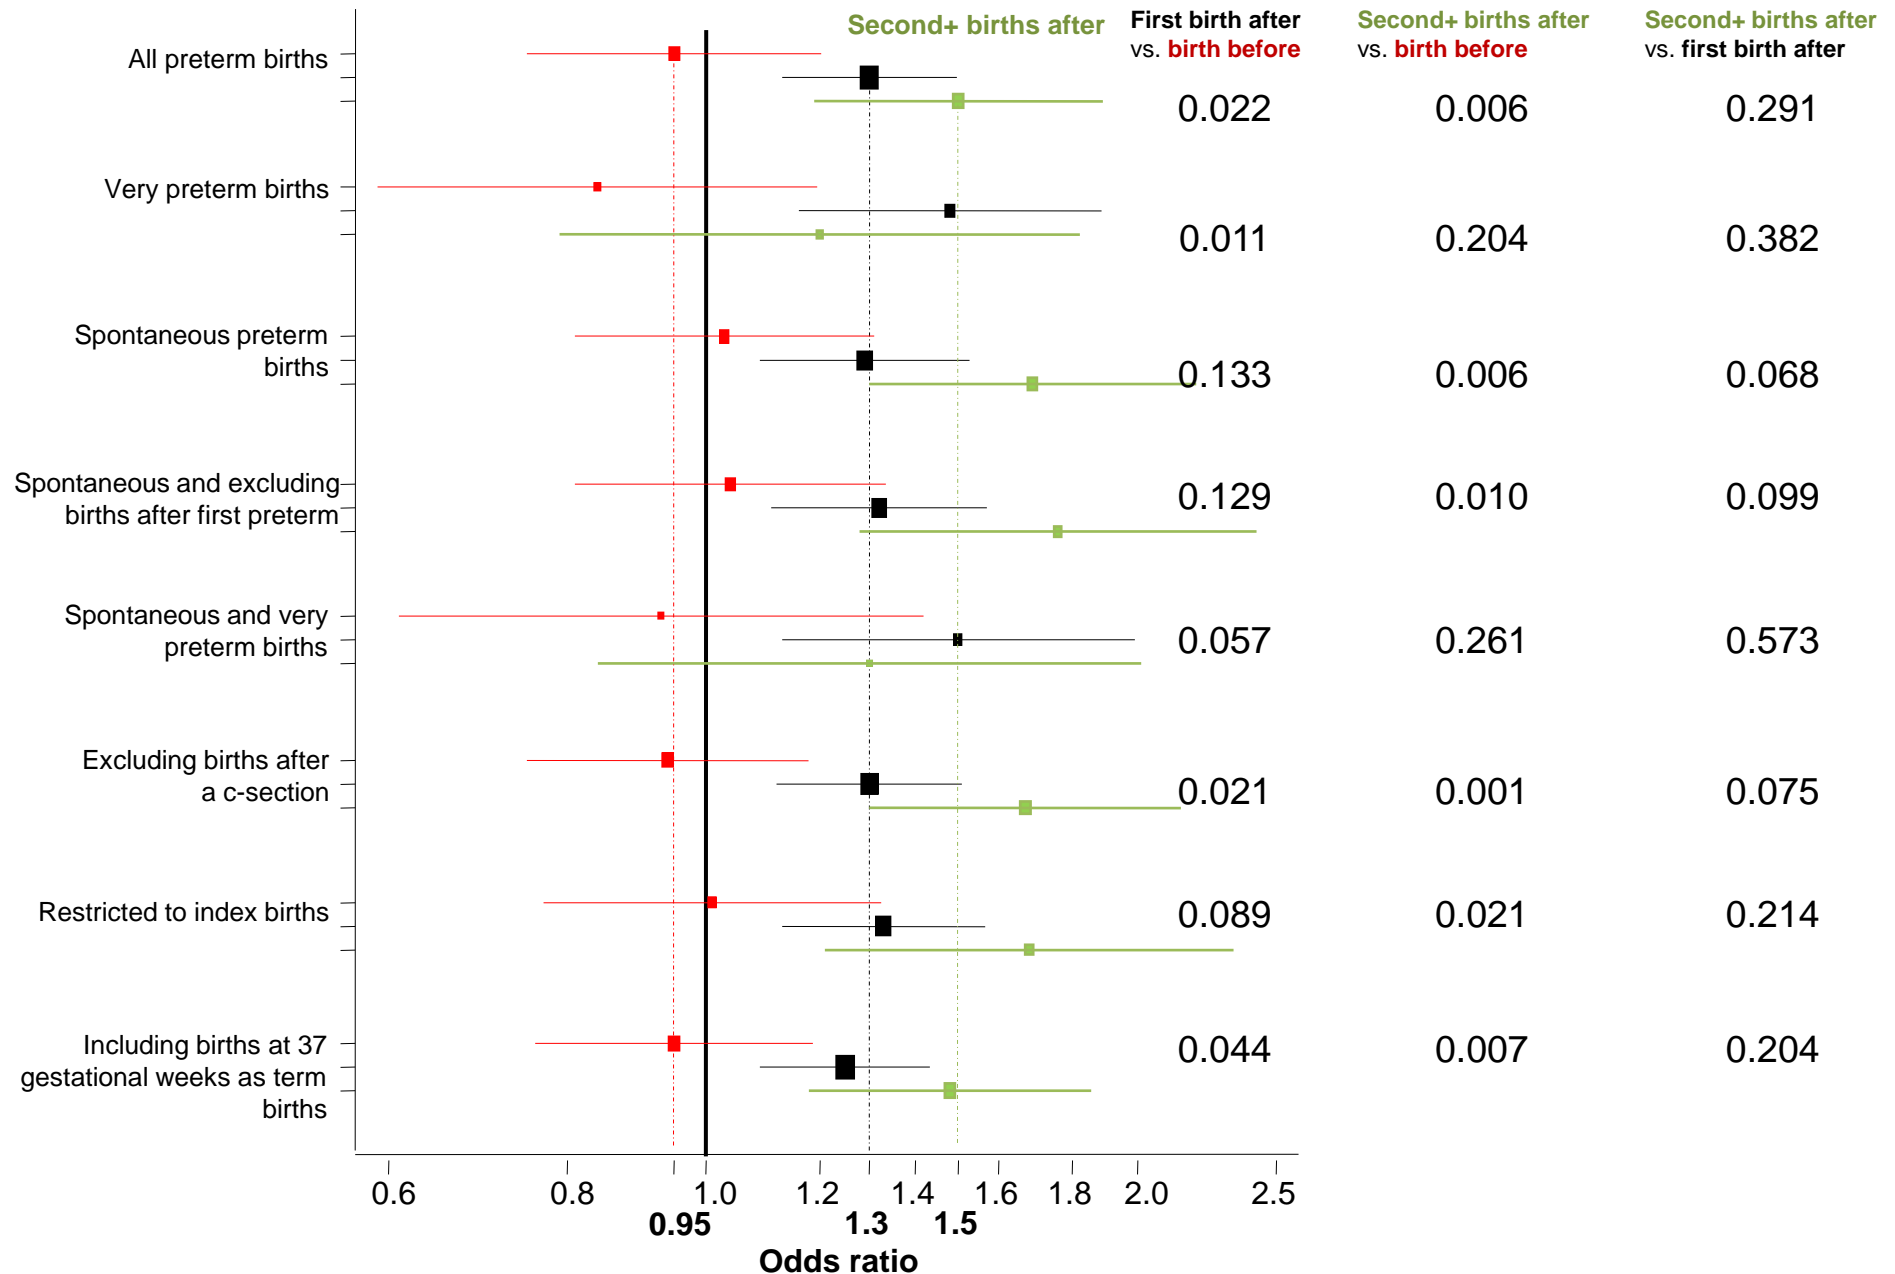

**Figure S1.** Sensitivity analyses. Odds ratio of preterm delivery with increasing depth of excision (trends) stratified by timing of colposcopy relative to the birth. P-values for the interaction between depth of treatment and timing of colposcopy in relation to the birth
