# Supplementary material for: Is the increased risk of preterm birth following excision for cervical intraepithelial neoplasia restricted to the first birth post treatment?
Source: PubMed Central journal article supplement — BJOG. 2015 Apr 9;122(9):1191–9. doi: 10.1111/1471-0528.13398 (PMC5008142; doi:10.1111/1471-0528.13398), 2015-04-09
Supplement: BJO-122-1191-s011.pdf [file BJO-122-1191-s011.pdf]

**Table S1.** High risk pregnancies: ICD codes and number of women with the code in the study

| <b>ICD10 Diagnostic Codes</b>     | <b>Condition</b>                                                                                          | <b>Timing</b>    |
|-----------------------------------|-----------------------------------------------------------------------------------------------------------|------------------|
| E10                               | Insulin-dependent diabetes mellitus                                                                       | At any time      |
| E66.2 or E66.8                    | Morbid/extreme obesity                                                                                    | At any time      |
| E11-E14                           | Other forms of diabetes mellitus                                                                          | Before the birth |
| O26.2                             | Pregnancy care of habitual aborter                                                                        | Before the birth |
| O24                               | Diabetes mellitus in pregnancy                                                                            | At the birth     |
| F10-F19, excl. acute intoxication | Mental and behavioural disorders due to psychoactive substance use                                        | At the birth     |
| O99.3                             | Mental disorders and diseases of the nervous system complicating pregnancy, childbirth and the puerperium | At the birth     |
| O10-O16, excluding O12            | Oedema, proteinuria and hypertensive disorders in pregnancy, childbirth and the puerperium                | At the birth     |
| O35                               | Maternal care for (suspected) fetal abnormality and/or damage                                             | At the birth     |
| O36.2                             | maternal care for hydrops fetalis                                                                         | At the birth     |
| O36.3                             | maternal care for signs of fetal hypoxia                                                                  | At the birth     |
| O41.1                             | Infection of amniotic sac and membranes                                                                   | At the birth     |
| O45                               | premature separation of placenta [abruptio placentae]                                                     | At the birth     |
| O44.1                             | Placenta praevia with haemorrhage                                                                         | At the birth     |
| Z35.8, Z35.9                      | Supervision of high-risk pregnancy                                                                        | At the birth     |
| Z97.5                             | Presence of (intrauterine) contraceptive device                                                           | At the birth     |
| O26.3                             | Retained intrauterine contraceptive device in pregnancy                                                   | At the birth     |
| P56                               | Hydrops fetalis due to haemolytic disease                                                                 | At the birth     |
| O71.0                             | Rupture of uterus before onset of labour                                                                  | At the birth     |

\*Note: some women had more than one high risk ICD code

**Table S2.** Main characteristics of the births included in the cohort and the case-control study

|                                       | Cohort       |             | Case-control |             |
|---------------------------------------|--------------|-------------|--------------|-------------|
| <b>Maternal age at treatment</b>      |              |             |              |             |
| <20                                   | 406          | 2%          | 98           | 4%          |
| 20-24                                 | 6154         | 33%         | 914          | 33%         |
| 25-29                                 | 6726         | 36%         | 1046         | 37%         |
| 30-34                                 | 3712         | 20%         | 552          | 20%         |
| 35-39                                 | 1272         | 7%          | 167          | 6%          |
| 40+                                   | 171          | 1%          | 21           | 1%          |
| <b>Maternal age at delivery</b>       |              |             |              |             |
| <20                                   | 395          | 2%          | 60           | 2%          |
| 20-24                                 | 2013         | 11%         | 337          | 12%         |
| 25-29                                 | 5082         | 28%         | 754          | 27%         |
| 30-34                                 | 6590         | 36%         | 1027         | 37%         |
| 35-39                                 | 3703         | 20%         | 552          | 20%         |
| 40+                                   | 658          | 4%          | 68           | 2%          |
| <b>Parity</b>                         |              |             |              |             |
| None                                  | 9094         | 49%         | 1366         | 49%         |
| 1                                     | 4960         | 27%         | 758          | 27%         |
| 2                                     | 2220         | 12%         | 322          | 12%         |
| ≥3                                    | 2167         | 12%         | 352          | 13%         |
| <b>Birth order</b>                    |              |             |              |             |
| Birth before colposcopy               | 4175         | 23%         | 574          | 21%         |
| First birth after colposcopy          | 10530        | 57%         | 1503         | 54%         |
| Second or more birth after colposcopy | 3736         | 20%         | 721          | 26%         |
| <b>Deprivation (in quintiles)</b>     |              |             |              |             |
| 1 (most deprived)                     | 6237         | 34%         | 915          | 33%         |
| 2                                     | 4444         | 24%         | 710          | 25%         |
| 3                                     | 3442         | 19%         | 552          | 20%         |
| 4                                     | 2444         | 13%         | 371          | 13%         |
| 5 (least deprived)                    | 1769         | 10%         | 247          | 9%          |
| missing                               | 105          | 1%          | 3            | 0%          |
| <b>Total</b>                          | <b>18441</b> | <b>100%</b> | <b>2798</b>  | <b>100%</b> |

**Table S3.** Absolute risks of preterm birth by timing of colposcopy in relation to birth and depth of excisional procedure

| Procedure at colposcopy  | Timing of colposcopy in relation to the birth |                      |                               |                      |                                        |                      |
|--------------------------|-----------------------------------------------|----------------------|-------------------------------|----------------------|----------------------------------------|----------------------|
|                          | Birth before colposcopy                       |                      | First births after colposcopy |                      | Second or more births after colposcopy |                      |
|                          | <b>N in cohort</b>                            | <b>% preterm</b>     | <b>N in cohort</b>            | <b>% preterm</b>     | <b>N in cohort</b>                     | <b>% preterm</b>     |
|                          | <b>OR (95% CI)</b>                            | <b>Absolute Risk</b> | <b>OR (95% CI)</b>            | <b>Absolute Risk</b> | <b>OR (95% CI)</b>                     | <b>Absolute Risk</b> |
| Punch biopsy (reference) | 1735                                          | 6.9%                 | 5305                          | 8.5%                 | 1959                                   | 6.9%                 |
| Small, medium, unknown   | 1.15 (0.74 to 1.77)                           | 7.9%                 | 1.16 (0.90 to 1.49)           | 9.8%                 | 1.30 (0.88 to 1.93)                    | 9.1%                 |
| Large, very large        | 0.95 (0.52 to 1.76)                           | 6.5%                 | 2.22 (1.55 to 3.19)           | 18.9%                | 2.47 (1.41 to 4.34)                    | 17.2%                |
